# Supplementary material for: Quality and outcomes in global cancer surgery: protocol for a multicentre, international, prospective cohort study (GlobalSurg 3)
Source: PubMed Central journal article supplement (PMC6538014; doi:10.1136/bmjopen-2018-026646), 2019-05-24
Supplement: bmjopen-2018-026646supp001.pdf [file bmjopen-2018-026646supp001.pdf]

## SUPPLEMENTARY FILE 1. Required data fields for all patients

|                                                                                          |                                                                                                                                                                                                                         |
|------------------------------------------------------------------------------------------|-------------------------------------------------------------------------------------------------------------------------------------------------------------------------------------------------------------------------|
| <b>Patient characteristics</b>                                                           |                                                                                                                                                                                                                         |
| Patient ID                                                                               | Local hospital field                                                                                                                                                                                                    |
| Primary method of patient identification                                                 | Multidisciplinary team meeting / tumour board list, outpatient clinic list, theatre logbook, planned operating list, ward/handover list, staff memory                                                                   |
| Age                                                                                      | Completed years                                                                                                                                                                                                         |
| Gender                                                                                   | Male, Female, Unknown                                                                                                                                                                                                   |
| Body mass index (weight (kg) / height <sup>2</sup> (metres))                             | Underweight (BMI <18.5)<br>Normal weight (BMI 18.5 to 24.9)<br>Overweight (BMI 25 to 30)<br>Obese (BMI >30)                                                                                                             |
| Unintentional weight loss (≥10% over 6 months, include clothes size ref in key)          | No, Yes, Unknown                                                                                                                                                                                                        |
| Performance status                                                                       | 0, 1, 2, 3, 4, Unknown                                                                                                                                                                                                  |
| ASA score                                                                                | I, II, III, IV, V, Unknown                                                                                                                                                                                              |
| Smoking status                                                                           | No-never, Stopped >6 weeks ago, Yes-current smoker, Unknown                                                                                                                                                             |
| Diabetes                                                                                 | No<br>Diet controlled<br>Medication (non-insulin) controlled<br>Insulin Controlled<br>Unknown                                                                                                                           |
| Human Immunodeficiency Virus (HIV) tested                                                | No, Yes-NEGATIVE, Yes-POSITIVE                                                                                                                                                                                          |
| <b>Pathway</b>                                                                           |                                                                                                                                                                                                                         |
| Presentation                                                                             | Symptomatic, screening, detected incidentally, unknown                                                                                                                                                                  |
| Date of first consult for cancer symptoms (may be estimated)                             | DD/MM/YYYY                                                                                                                                                                                                              |
| Who did the patient first consult for cancer symptoms?                                   | Local clinic: family doctor / general practitioner<br>Local clinic: nurse<br>Local clinic: specialist doctor<br>Hospital: out-patient clinic<br>Hospital: in-patient<br>Other/non-medical/traditional healer<br>Unknown |
| Distance from home to hospital                                                           | < 10 km, 10-20 km, 20-50 km, 50-100 km, >100 km, Unknown                                                                                                                                                                |
| <b>Disease characteristics</b>                                                           |                                                                                                                                                                                                                         |
| Location                                                                                 | Breast, Gastric, Colorectal                                                                                                                                                                                             |
| <i>Cancer specific information</i>                                                       | <i>Fixed fields for each cancer (see specific cancer variables)</i>                                                                                                                                                     |
| <i>Diagnosis (what tests were performed pre-operatively, please tick all that apply)</i> | <i>Fixed fields for each cancer (see specific cancer variables)</i>                                                                                                                                                     |
| Clinical stage                                                                           | TNM classification / Essential TNM Classification                                                                                                                                                                       |
| <i>Neoadjuvant therapy</i>                                                               | <i>Fixed fields for each cancer (see specific cancer variables)</i>                                                                                                                                                     |
| <b>Operative characteristics</b>                                                         |                                                                                                                                                                                                                         |
| Date of admission                                                                        | DD/MM/YY, 24 hour clock                                                                                                                                                                                                 |
| Date and time of operation                                                               | DD/MM/YY, 24 hour clock                                                                                                                                                                                                 |
| Urgency of operation                                                                     | Elective, Emergency                                                                                                                                                                                                     |
| Surgical intent (at completion of procedure)                                             | Palliative, Curative                                                                                                                                                                                                    |
| Was a surgical safety checklist used?                                                    | No-but available in this hospital, No-but available in this hospital, Yes, Unknown                                                                                                                                      |
| <i>Primary operation performed</i>                                                       | <i>Fixed fields for each cancer (see specific cancer variables)</i>                                                                                                                                                     |
| <b>Pathology</b>                                                                         |                                                                                                                                                                                                                         |
| Most valid basis for cancer diagnosis                                                    | Clinical only<br>Imaging<br>Exploratory surgery/endoscopy without histology<br>Tumour specific markers<br>Cytology<br>Histology of metastasis (secondary deposit)<br>Histology of primary                               |
| <i>Histology</i>                                                                         | <i>Fixed fields for each cancer (see specific cancer variables)</i>                                                                                                                                                     |
| Size of invasive tumour                                                                  | Centimetres                                                                                                                                                                                                             |

|                                                                                                              |                                                                                                                                                                                                                                      |
|--------------------------------------------------------------------------------------------------------------|--------------------------------------------------------------------------------------------------------------------------------------------------------------------------------------------------------------------------------------|
| TNM (pathology)                                                                                              |                                                                                                                                                                                                                                      |
| Number of INVOLVED lymph nodes in specimen                                                                   |                                                                                                                                                                                                                                      |
| TOTAL number of lymph nodes in specimen                                                                      |                                                                                                                                                                                                                                      |
| Histological grade                                                                                           | 1, 2, 3, 4                                                                                                                                                                                                                           |
| Lymphatic or vascular invasion                                                                               | No, Yes, Unknown                                                                                                                                                                                                                     |
| Resection margins                                                                                            | Fixed fields for each cancer (see specific cancer variables)                                                                                                                                                                         |
| <b>Outcomes and adjuvant treatment</b>                                                                       |                                                                                                                                                                                                                                      |
| Length of postoperative stay                                                                                 | Continuous number of days                                                                                                                                                                                                            |
| How was 30-day follow-up status achieved? (dropdown box)                                                     | Still an inpatient OR re-admitted<br>Clinic review<br>Telephone review<br>Community/home review<br>Discharged before 30 days and not contacted again                                                                                 |
| 30-day mortality (if alive at the point of discharge and no follow-up information available, indicate Alive) | Alive, Dead (date of death), Unknown                                                                                                                                                                                                 |
| 30-day cancer-specific complications                                                                         | Fixed fields for each cancer (see specific cancer variables)                                                                                                                                                                         |
| 30-day minor complication (CD I)                                                                             | No, Yes, Unknown                                                                                                                                                                                                                     |
| 30-day minor complication (CD II)                                                                            | No, Yes, Unknown                                                                                                                                                                                                                     |
| 30-day unexpected re-intervention (CD III)                                                                   | No, Yes-NOT under general anaesthetic, Yes-under anaesthetic, Unknown                                                                                                                                                                |
| 30-day unplanned critical care admission (CD IV)                                                             | No, Yes-single organ failure, Yes-multi organ failure, Unknown                                                                                                                                                                       |
| 30-day unplanned hospital readmission                                                                        | No, Yes, Unknown                                                                                                                                                                                                                     |
| Surgical site infection                                                                                      | No<br>Yes, no treatment/wound opened only (CD I)<br>Yes, antibiotics only (CD II)<br>Yes, return to operating theatre (CD III)<br>Yes, requiring critical care admission (CD IV)<br>Yes, resulting in death (CD V)<br>Unknown        |
| Post-operative haemorrhage                                                                                   | No<br>Yes, no intervention required (CD I)<br>Yes, drug treatment only (CD II)<br>Yes, intervention required (CD III)<br>Yes, critical care admission &/- intervention required (CD IV)<br>Yes, resulting in death (CD V)<br>Unknown |
| <i>Planned adjuvant treatment</i>                                                                            | <i>Fixed fields for each cancer (see specific cancer variables)</i>                                                                                                                                                                  |

Those written in italics represent variables which have cancer-specific data points
