# Supplementary material for: Quality and outcomes in global cancer surgery: protocol for a multicentre, international, prospective cohort study (GlobalSurg 3)
Source: PubMed Central journal article supplement (PMC6538014; doi:10.1136/bmjopen-2018-026646), 2019-05-24
Supplement: bmjopen-2018-026646supp002.pdf [file bmjopen-2018-026646supp002.pdf]

## SUPPLEMENTARY FILE 2. Required data fields for patients with breast cancer

|                                                                                   |                                                                                                                                                                                                                                                                                                                                                                                                                                                                                                                                                                                                                                                                                                                                                                                                                                                                                                                                                                                                                                                                                                                                                                                                                                                        |
|-----------------------------------------------------------------------------------|--------------------------------------------------------------------------------------------------------------------------------------------------------------------------------------------------------------------------------------------------------------------------------------------------------------------------------------------------------------------------------------------------------------------------------------------------------------------------------------------------------------------------------------------------------------------------------------------------------------------------------------------------------------------------------------------------------------------------------------------------------------------------------------------------------------------------------------------------------------------------------------------------------------------------------------------------------------------------------------------------------------------------------------------------------------------------------------------------------------------------------------------------------------------------------------------------------------------------------------------------------|
| <b>Disease characteristics</b>                                                    |                                                                                                                                                                                                                                                                                                                                                                                                                                                                                                                                                                                                                                                                                                                                                                                                                                                                                                                                                                                                                                                                                                                                                                                                                                                        |
| Diagnosis (what tests were performed pre-operatively, please tick all that apply) | <ul style="list-style-type: none"> <li>&gt; USS (No-not available, No-not indicated, No-indicated and facilities available, but patient not able to pay, Yes, Unknown)</li> <li>&gt; CT (No-not available, No-not indicated, No-indicated and facilities available, but patient not able to pay, Yes, Unknown)</li> <li>&gt; MRI (No-not available, No-not indicated, No-indicated and facilities available, but patient not able to pay, Yes, Unknown)</li> <li>&gt; Mammogram (No-not available, No-not indicated, No-indicated and facilities available, but patient not able to pay, Yes, Unknown)</li> <li>&gt; Fine needle aspiration (No-not available, No-not indicated, No-indicated and facilities available, but patient not able to pay, Yes, Unknown)</li> <li>&gt; Core biopsy (No-not available, No-not indicated, No-indicated and facilities available, but patient not able to pay, Yes, Unknown)</li> <li>&gt; Open/excision biopsy (No-not available, No-not indicated, No-indicated and facilities available, but patient not able to pay, Yes, Unknown)</li> <li>&gt; ER, PR, Ki-67, HER2 status assessed (No-not available in this hospital, No-but available in this hospital, Yes-NEGATIVE, Yes-POSITIVE, Unknown)</li> </ul> |
| Stage (dropdown box)                                                              | TNM classification / Essential TNM classification<br>Unknown                                                                                                                                                                                                                                                                                                                                                                                                                                                                                                                                                                                                                                                                                                                                                                                                                                                                                                                                                                                                                                                                                                                                                                                           |
| Neoadjuvant chemotherapy                                                          | <ul style="list-style-type: none"> <li>No, patient does not need it</li> <li>No, patient needs it, but not available</li> <li>No, patient needs it, facilities available, but patient not able to pay</li> <li>No, planned but not given</li> <li>Yes, NO anthracycline, NO taxane</li> <li>Yes, anthracycline, NO taxane</li> <li>Yes, anthracycline AND taxane</li> <li>Yes, regimen unknown</li> <li>Unknown</li> </ul>                                                                                                                                                                                                                                                                                                                                                                                                                                                                                                                                                                                                                                                                                                                                                                                                                             |
| Neoadjuvant radiotherapy                                                          | <ul style="list-style-type: none"> <li>No, patient does not need it</li> <li>No, patient needs it, but not available</li> <li>No, patient needs it, facilities available, but patient not able to pay</li> <li>No, planned but not given</li> <li>Yes (Cobalt)</li> <li>Yes (Linear accelerator)</li> <li>Yes (type unknown)</li> <li>Unknown</li> </ul>                                                                                                                                                                                                                                                                                                                                                                                                                                                                                                                                                                                                                                                                                                                                                                                                                                                                                               |
| Other neoadjuvant treatment (tick all that apply)                                 | <ul style="list-style-type: none"> <li>Hormone therapy</li> <li>Biological therapy (HER2 inhibitor)</li> <li>Oophrectomy</li> <li>Other (free text)</li> </ul>                                                                                                                                                                                                                                                                                                                                                                                                                                                                                                                                                                                                                                                                                                                                                                                                                                                                                                                                                                                                                                                                                         |
| <b>Operation</b>                                                                  |                                                                                                                                                                                                                                                                                                                                                                                                                                                                                                                                                                                                                                                                                                                                                                                                                                                                                                                                                                                                                                                                                                                                                                                                                                                        |
| Primary operation                                                                 | <ul style="list-style-type: none"> <li>Mastectomy</li> <li>Partial mastectomy / wide local excision / lumpectomy</li> <li>Open biopsy of breast</li> <li>Other operations on breast</li> </ul>                                                                                                                                                                                                                                                                                                                                                                                                                                                                                                                                                                                                                                                                                                                                                                                                                                                                                                                                                                                                                                                         |
| Sentinel lymph node biopsy                                                        | <ul style="list-style-type: none"> <li>No, not available in this hospital</li> <li>No, but available in this hospital</li> <li>Yes, single technique</li> <li>Yes, dual technique</li> <li>Unknown</li> </ul>                                                                                                                                                                                                                                                                                                                                                                                                                                                                                                                                                                                                                                                                                                                                                                                                                                                                                                                                                                                                                                          |
| Axillary lymph node biopsy                                                        | No, Yes, Unknown                                                                                                                                                                                                                                                                                                                                                                                                                                                                                                                                                                                                                                                                                                                                                                                                                                                                                                                                                                                                                                                                                                                                                                                                                                       |
| Resection margins checked at time of surgery                                      | <ul style="list-style-type: none"> <li>No, not available in this hospital</li> <li>No, but available in this hospital</li> <li>Yes, by x-ray</li> <li>Yes, by frozen section</li> </ul>                                                                                                                                                                                                                                                                                                                                                                                                                                                                                                                                                                                                                                                                                                                                                                                                                                                                                                                                                                                                                                                                |

|                                                  |                                                                                                                                                                                                                                                                                                                                                                                         |
|--------------------------------------------------|-----------------------------------------------------------------------------------------------------------------------------------------------------------------------------------------------------------------------------------------------------------------------------------------------------------------------------------------------------------------------------------------|
|                                                  | Unknown                                                                                                                                                                                                                                                                                                                                                                                 |
| Reconstruction                                   | No, not available in this hospital<br>No, but available in this hospital<br>Yes, immediate – prosthesis<br>Yes, immediate – flap<br>Yes, planned at later stage                                                                                                                                                                                                                         |
| <b>Pathology</b>                                 |                                                                                                                                                                                                                                                                                                                                                                                         |
| Histology                                        | Invasive ductal carcinoma<br>Invasive lobular carcinoma<br>Ductal carcinoma in-situ (DCIS)<br>Other CANCER (specify)<br>Other BENIGN (specify)<br>Unknown, not available in this hospital<br>Unknown, but available in this hospital                                                                                                                                                    |
| Receptor status                                  | ER, PR, Ki67, HER2<br>No-not available in this hospital, No-but available in this hospital, Yes-NEGATIVE, Yes-POSITIVE, Unknown                                                                                                                                                                                                                                                         |
| Resection margins                                | < 1 mm / tumour on inked margin<br>1-5 mm (NO tumour on inked margin)<br>>5 mm<br>Margins confirmed clear, but no distance given<br>Unknown, not available in this hospital<br>Unknown, but available in this hospital                                                                                                                                                                  |
| <b>Outcomes and Adjuvant treatment</b>           |                                                                                                                                                                                                                                                                                                                                                                                         |
| Post-operative seroma                            | No<br>Yes, no intervention/aspiration only (CD I)<br>Yes, antibiotic treatment only (CD II)<br>Yes, intervention required (CD III)<br>Yes, critical care admission &/- intervention (CD IV)<br>Yes, resulting in death (CD V)<br>Unknown                                                                                                                                                |
| Planned adjuvant treatment (tick all that apply) | No, patient does not need it<br>No, patient needs it, but not available<br>No, patient needs it, facilities available, patient unable to pay<br>Yes, in this hospital<br>Yes, in another hospital in this country<br>Yes, in another hospital in a different country<br><br>Chemotherapy<br>Radiotherapy<br>Biological therapy (HER2 inhibitor)<br>Hormone therapy<br>Other (free text) |
