# Supplementary material for: Quality and outcomes in global cancer surgery: protocol for a multicentre, international, prospective cohort study (GlobalSurg 3)
Source: PubMed Central journal article supplement (PMC6538014; doi:10.1136/bmjopen-2018-026646), 2019-05-24
Supplement: bmjopen-2018-026646supp003.pdf [file bmjopen-2018-026646supp003.pdf]

### SUPPLEMENTARY FILE 3. Required data fields for patients with gastric cancer

|                                                                                    |                                                                                                                                                                                                                                                                                                                                                                                                                                                                                                                                                                                                                                                                                                                                                                                                                                                                                                                                    |
|------------------------------------------------------------------------------------|------------------------------------------------------------------------------------------------------------------------------------------------------------------------------------------------------------------------------------------------------------------------------------------------------------------------------------------------------------------------------------------------------------------------------------------------------------------------------------------------------------------------------------------------------------------------------------------------------------------------------------------------------------------------------------------------------------------------------------------------------------------------------------------------------------------------------------------------------------------------------------------------------------------------------------|
| <b>Disease characteristics</b>                                                     |                                                                                                                                                                                                                                                                                                                                                                                                                                                                                                                                                                                                                                                                                                                                                                                                                                                                                                                                    |
| Diagnostic (what tests were performed pre-operatively, please tick all that apply) | <ul style="list-style-type: none"> <li>&gt; USS (No-not available, No-not indicated, No, indicated and facilities available, but patient not able to pay), Yes, Unknown)</li> <li>&gt; CT (No-not available, No-not indicated, No, indicated and facilities available, but patient not able to pay), Yes, Unknown)</li> <li>&gt; MRI (No-not available, No-not indicated, No, indicated and facilities available, but patient not able to pay), Yes, Unknown)</li> <li>&gt; Endoscopy (No-not available, No-not indicated, No, indicated and facilities available, but patient not able to pay), Yes, Unknown)</li> <li>&gt; Biopsy (No-not available, No-not indicated, No, indicated and facilities available, but patient not able to pay), Yes, Unknown)</li> <li>&gt; Staging laparoscopy (No-not available, No-not indicated, No, indicated and facilities available, but patient not able to pay), Yes, Unknown)</li> </ul> |
| Stage (dropdown box)                                                               | TNM classification / Essential TNM classification                                                                                                                                                                                                                                                                                                                                                                                                                                                                                                                                                                                                                                                                                                                                                                                                                                                                                  |
| Neoadjuvant chemotherapy                                                           | <ul style="list-style-type: none"> <li>No, patient does not need it</li> <li>No, patient needs it, but not available</li> <li>No, patient needs it, facilities available, but patient not able to pay</li> <li>No, planned but not given</li> <li>Yes</li> <li>Unknown</li> </ul>                                                                                                                                                                                                                                                                                                                                                                                                                                                                                                                                                                                                                                                  |
| Neoadjuvant radiotherapy                                                           | <ul style="list-style-type: none"> <li>No, patient does not need it</li> <li>No, patient needs it, but not available</li> <li>No, patient needs it, facilities available, but patient not able to pay</li> <li>No, planned but not given</li> <li>Yes (Cobalt)</li> <li>Yes (Linear accelerator)</li> <li>Yes (type unknown)</li> <li>Unknown</li> </ul>                                                                                                                                                                                                                                                                                                                                                                                                                                                                                                                                                                           |
| Other neoadjuvant treatment (tick all that apply)                                  | Other (free text)                                                                                                                                                                                                                                                                                                                                                                                                                                                                                                                                                                                                                                                                                                                                                                                                                                                                                                                  |
| <b>Operation</b>                                                                   |                                                                                                                                                                                                                                                                                                                                                                                                                                                                                                                                                                                                                                                                                                                                                                                                                                                                                                                                    |
| Primary operation                                                                  | <ul style="list-style-type: none"> <li>Abdomen: Laparotomy with no other procedure</li> <li>Abdomen: Diagnostic laparoscopy with no other procedure</li> <li>Stomach: Total excision of stomach</li> <li>Stomach: Partial excision of stomach</li> <li>Stomach: Connection of stomach to jejunum</li> <li>Stomach: Other open operations on stomach</li> </ul>                                                                                                                                                                                                                                                                                                                                                                                                                                                                                                                                                                     |
| Operative approach                                                                 | <ul style="list-style-type: none"> <li>Open</li> <li>Laparoscopic (+/- open specimen extraction)</li> <li>Laparoscopic converted to open</li> <li>Robotic</li> <li>Robotic converted to open</li> </ul>                                                                                                                                                                                                                                                                                                                                                                                                                                                                                                                                                                                                                                                                                                                            |
| Site                                                                               | <ul style="list-style-type: none"> <li>Upper third (cardia/fundus)</li> <li>Middle third (body)</li> <li>Distal third (antrum/pylorus)</li> <li>Entire stomach</li> <li>Unknown</li> </ul>                                                                                                                                                                                                                                                                                                                                                                                                                                                                                                                                                                                                                                                                                                                                         |
| Cancer specific information                                                        | <ul style="list-style-type: none"> <li>&gt; Anastomosis: Not performed, handsewn, stapled, unknown</li> <li>&gt; D2 lymphadenectomy performed: No, Yes, Unknown</li> <li>&gt; Obstructed: No, Yes, Unknown</li> <li>&gt; Perforated: No, Yes, Unknown</li> </ul>                                                                                                                                                                                                                                                                                                                                                                                                                                                                                                                                                                                                                                                                   |
| <b>Pathology</b>                                                                   |                                                                                                                                                                                                                                                                                                                                                                                                                                                                                                                                                                                                                                                                                                                                                                                                                                                                                                                                    |
| Histology (dropdown box)                                                           | <ul style="list-style-type: none"> <li>Adenocarcinoma</li> <li>Lymphoma</li> <li>Gastrointestinal stromal tumour (GIST)</li> <li>Carcinoid</li> <li>Other CANCER (specify)</li> <li>Other BENIGN (specify)</li> </ul>                                                                                                                                                                                                                                                                                                                                                                                                                                                                                                                                                                                                                                                                                                              |

|                                                              |                                                                                                                                                                                                                                                                                                                                                                                                  |
|--------------------------------------------------------------|--------------------------------------------------------------------------------------------------------------------------------------------------------------------------------------------------------------------------------------------------------------------------------------------------------------------------------------------------------------------------------------------------|
|                                                              | Unknown, histology not available in this hospital<br>Unknown, but histology available in this hospital                                                                                                                                                                                                                                                                                           |
| HER2 receptor status tested (on surgical resection specimen) | No-not available in this hospital, No-but available in this hospital, Yes-NEGATIVE, Yes-POSITIVE, Unknown                                                                                                                                                                                                                                                                                        |
| Resection margins                                            | No residual disease (R0)<br>Microscopic residual disease (R1)<br>Macroscopic residual disease (R2)<br>Unknown, not available in this hospital<br>Unknown, but available in this hospital                                                                                                                                                                                                         |
| <b>Outcomes and adjuvant treatment</b>                       |                                                                                                                                                                                                                                                                                                                                                                                                  |
| Intra-abdominal abscess                                      | No<br>Yes, no intervention (CD I)<br>Yes, antibiotics only (CD II)<br>Yes, surgical/radiological drainage (CD III)<br>Yes, critical care admission (CD IV)<br>Yes, resulting in death (CD V)<br>Unknown                                                                                                                                                                                          |
| Anastomotic leak                                             | No<br>Yes, no intervention required (CD I)<br>Yes, drug treatment only (CD II)<br>Yes, intervention required (CD III)<br>Yes, critical care admission &/- intervention required (CD IV)<br>Yes, resulting in death (CD V)<br>Unknown                                                                                                                                                             |
| Planned adjuvant treatment (tick all that apply)             | No, patient does not need it<br>No, patient needs it, but not available<br>No, patient needs it, facilities available, patient unable to pay<br>Yes, in this hospital<br>Yes, in another hospital in this country<br>Yes, in another hospital in a different country<br><br>Chemotherapy<br>Radiotherapy<br>Biological therapy (HER2 inhibitor)<br>Hormone therapy<br>HIPEC<br>Other (free text) |
